# Supplementary material for: Alkali metal modified Pt/EG-TiO2 catalysts for CO oxidation with efficient resistance to SO2 and H2O
Source: Royal Society of Chemistry journal article supplement (doi:10.1039/d4cy00205a), 2024-01-01
Supplement: d4cy00205a1.pdf [file d4cy00205a1.pdf]

## Supplementary Information

### **Alkali metal modified Pt/EG-TiO<sub>2</sub> catalysts for CO oxidation with efficient resistance to SO<sub>2</sub> and H<sub>2</sub>O**

Hongtai Zhu,<sup>ab</sup> Wenge Qiu,<sup>\*a</sup> Rui Wu,<sup>b</sup> Kai Li<sup>b</sup> and Hong He<sup>\*ab</sup>

*a Key Laboratory of Beijing on Regional Air Pollution Control, Beijing Key Laboratory for Green Catalysis and Separation, Beijing University of Technology, Beijing 100124, China*

*b Advanced E-catal. Corporation, Ltd., Beijing 100025, China*

\* Corresponding author, [qiuwenge@bjut.edu.cn](mailto:qiuwenge@bjut.edu.cn) (Wenge Qiu) and [hehong@bjut.edu.cn](mailto:hehong@bjut.edu.cn) (Hong He)

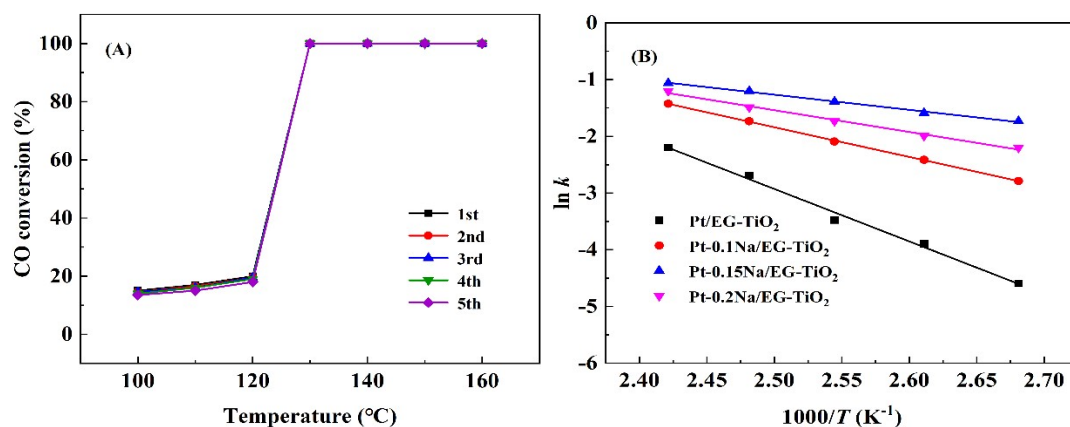

**Fig. S1 (A) Cycling of CO conversion over the Pt-0.15Na/EG-TiO<sub>2</sub> catalysts and (B) Arrhenius plots for CO oxidation over the catalysts. Reaction condition: 1 vol% CO, 6 vol% O<sub>2</sub>, He (balance); GHSV = 400,000 hr<sup>-1</sup>.**

**Table S1 Pt and Na contents in the samples determined by the ICP-AES technique, the dispersion of Pt in the samples determined by CO chemisorption and apparent activation energies ( $E_a$ ) for CO oxidation over the samples.**

| Samples                       | Pt content (%) | Na content (%) | Pt dispersion (%) | $E_a$ (kJ·mol <sup>-1</sup> ) |
|-------------------------------|----------------|----------------|-------------------|-------------------------------|
| Pt/EG-TiO <sub>2</sub>        | 0.92           | -              | 29.7              | 62.3                          |
| Pt-0.1Na/EG-TiO <sub>2</sub>  | 0.91           | 0.09           | 49.3              | 43.6                          |
| Pt-0.15Na/EG-TiO <sub>2</sub> | 0.90           | 0.13           | 60.1              | 22.2                          |
| Pt-0.2Na/EG-TiO <sub>2</sub>  | 0.91           | 0.18           | 58.2              | 31.9                          |

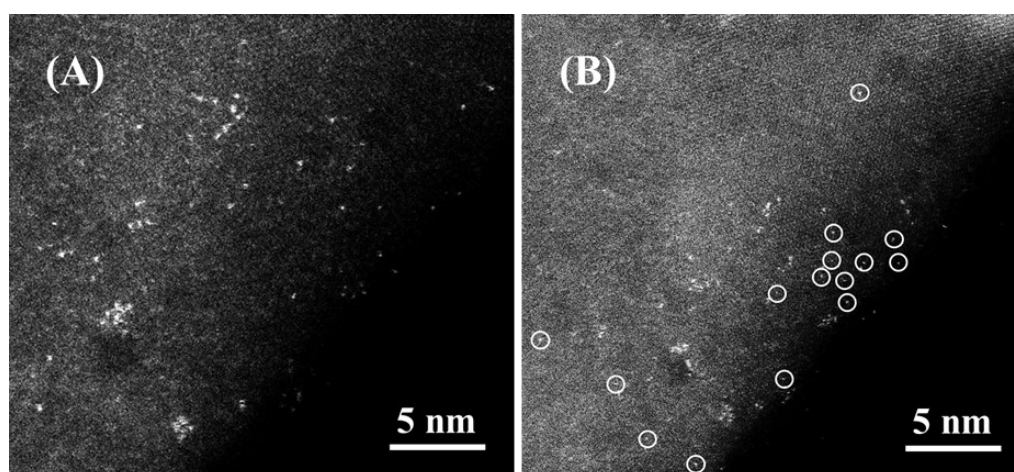

**Fig. S2 (A) and (B) AC-TEM images of Pt-0.15Na/EG-TiO<sub>2</sub> catalysts.**

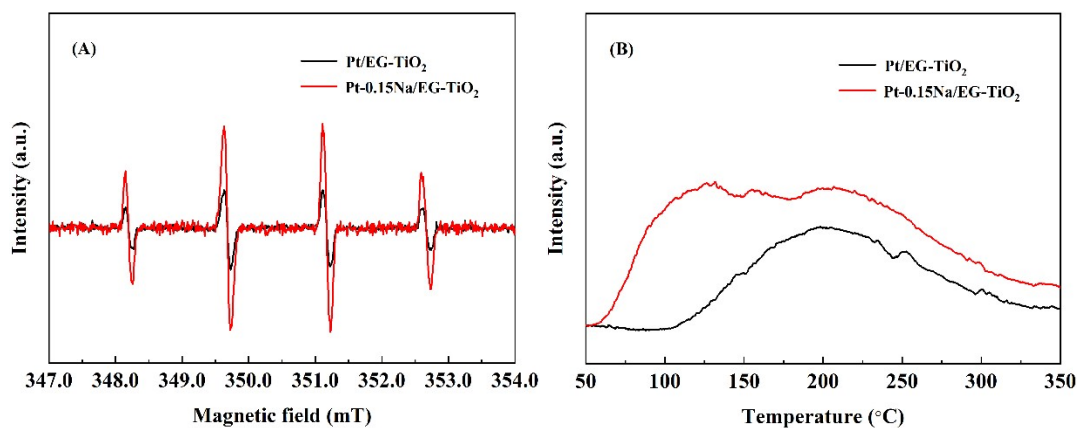

Fig. S3 (A) ESR and (B) O<sub>2</sub>-TPD spectra of catalysts.

Table S2 EXAFS fitting parameters for the Pt L<sub>3</sub> sides of the samples.

| Samples                       | Shell | $N^a$          | $R$ (Å) <sup>b</sup> | $\sigma^2$ (Å <sup>2</sup> ) <sup>c</sup> | $\Delta E_0$ (eV) <sup>d</sup> | R factor |
|-------------------------------|-------|----------------|----------------------|-------------------------------------------|--------------------------------|----------|
| Pt foil                       | Pt-Pt | 12*            | $2.766 \pm 0.001$    | $0.0045 \pm 0.0002$                       | $10.7 \pm 0.3$                 | 0.0032   |
|                               | Pt-O  | $5.5 \pm 0.3$  | $2.012 \pm 0.001$    | $0.0028 \pm 0.0005$                       | $14.0 \pm 0.3$                 |          |
| PtO <sub>2</sub>              | Pt-Pt | $4.2 \pm 1.0$  | $3.084 \pm 0.001$    | $0.0041 \pm 0.0013$                       | $10.7 \pm 0.9$                 | 0.0045   |
|                               | Pt-O  | $11.4 \pm 1.6$ | $4.018 \pm 0.001$    | $0.0036 \pm 0.0001$                       | $1.5 \pm 0.1$                  |          |
|                               | Pt-O  | $5.6 \pm 0.4$  | $2.010 \pm 0.001$    | $0.0012 \pm 0.0008$                       | $12.0 \pm 0.4$                 |          |
| Pt/EG-TiO <sub>2</sub>        | Pt-Pt | $6.1 \pm 0.1$  | $3.092 \pm 0.001$    | $0.0032 \pm 0.0006$                       | $9.7 \pm 1.0$                  | 0.0096   |
|                               | Pt-O  | $22.6 \pm 0.1$ | $4.036 \pm 0.001$    | $0.0081 \pm 0.0023$                       | $0.6 \pm 0.8$                  |          |
|                               | Pt-O  | $5.7 \pm 0.3$  | $1.984 \pm 0.001$    | $0.0017 \pm 0.0007$                       | $12.0 \pm 0.6$                 |          |
| Pt-0.15Na/EG-TiO <sub>2</sub> | Pt-Pt | $1.9 \pm 0.1$  | $3.185 \pm 0.001$    | $0.0044 \pm 0.0019$                       | $13.1 \pm 1.1$                 | 0.0077   |
|                               | Pt-O  | $9.6 \pm 0.1$  | $3.656 \pm 0.001$    |                                           |                                |          |

<sup>a</sup> $N$ : Coordination numbers; <sup>b</sup> $R$ : Bond distance; <sup>c</sup> $\sigma^2$ : Debye-Waller factors; <sup>d</sup> $\Delta E_0$ : The inner potential correction; \*: According to the experimental EXAFS fit of Pt foil reference as the known crystallographic value.

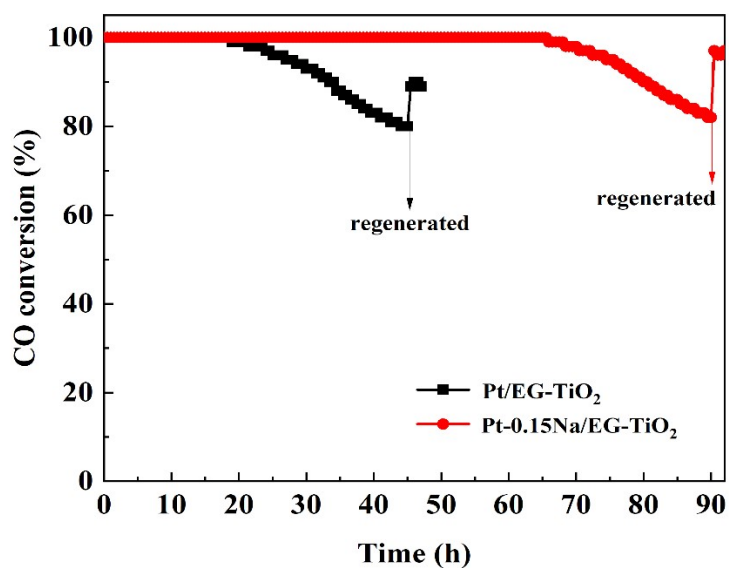

**Fig. S4 SO<sub>2</sub> and H<sub>2</sub>O resistance of the regenerated catalysts. Reaction condition: 1 vol% CO, 6 vol% O<sub>2</sub>, 100 ppm SO<sub>2</sub>, 10 vol% H<sub>2</sub>O, He (balance); GHSV = 400,000 h<sup>-1</sup>; temperature = 220 °C. Regeneration condition: 1 vol% CO, 6 vol% O<sub>2</sub>, He (balance); GHSV = 400,000 h<sup>-1</sup>; temperature = 350 °C constant for 3 h.**

**Table S3 SO<sub>2</sub> and H<sub>2</sub>O resistance of the catalysts on reported literatures.**

| Catalysts                     | Reaction condition                                                                                                                                                                         | Time (h) | CO conversion (%) | Reference |
|-------------------------------|--------------------------------------------------------------------------------------------------------------------------------------------------------------------------------------------|----------|-------------------|-----------|
| Pt-1P&M/TiO <sub>2</sub>      | 0.8 vol% CO, 15 vol% O <sub>2</sub> , 50 ppm SO <sub>2</sub> , 15 vol% H <sub>2</sub> O, N <sub>2</sub> (balance); GHSV = 30,000 h <sup>-1</sup> ; temperature = 170 °C.                   | 72       | 99                | 30        |
| Pt/Keg-CeTi                   | 1 vol% CO, 6 vol% O <sub>2</sub> , 100 ppm SO <sub>2</sub> , 10 vol% H <sub>2</sub> O, He (balance); GHSV = 400,000 h <sup>-1</sup> ; temperature = 200 °C.                                | 30       | 93                | 64        |
| 0.1Pt-5W/Ti-A                 | 1 vol% CO, 16 vol% O <sub>2</sub> , 50 ppm SO <sub>2</sub> , 10 vol% H <sub>2</sub> O, N <sub>2</sub> (balance); GHSV = 90,000 mL·g <sup>-1</sup> ·h <sup>-1</sup> ; temperature = 220 °C. | 26       | 85                | 69        |
| Pt-0.15Na/EG-TiO <sub>2</sub> | 1 vol% CO, 6 vol% O <sub>2</sub> , 100 ppm SO <sub>2</sub> , 10 vol% H <sub>2</sub> O, He (balance); GHSV = 400,000 h <sup>-1</sup> ; temperature = 220 °C.                                | 66       | 100               | This work |

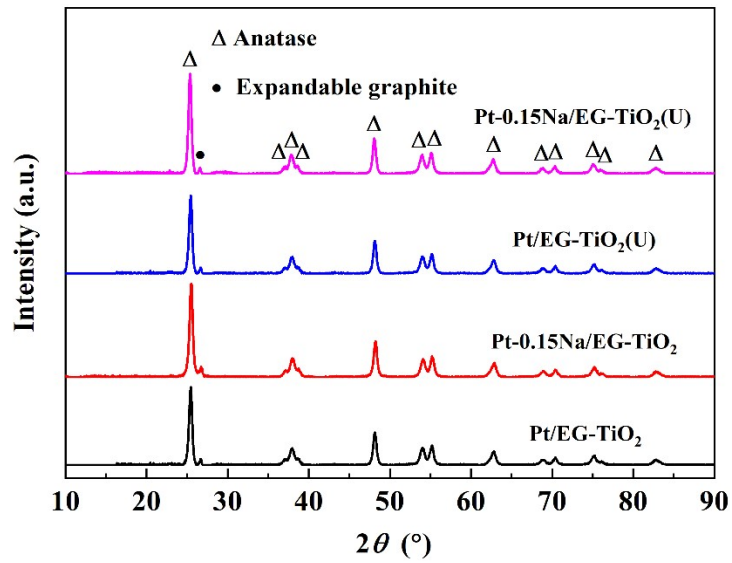

Fig. S5 XRD patterns of the as-obtained catalysts.

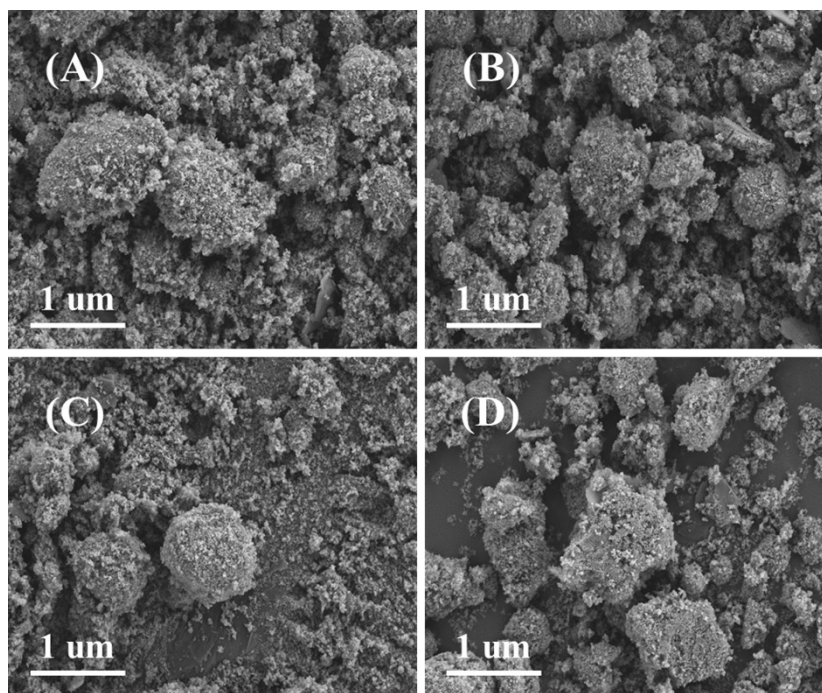

Fig. S6 SEM images of (A) Pt/EG-TiO<sub>2</sub>, (B) Pt-0.15Na/EG-TiO<sub>2</sub>, (C) Pt/EG-TiO<sub>2</sub>(U), and (D) Pt-0.15Na/EG-TiO<sub>2</sub>(U).

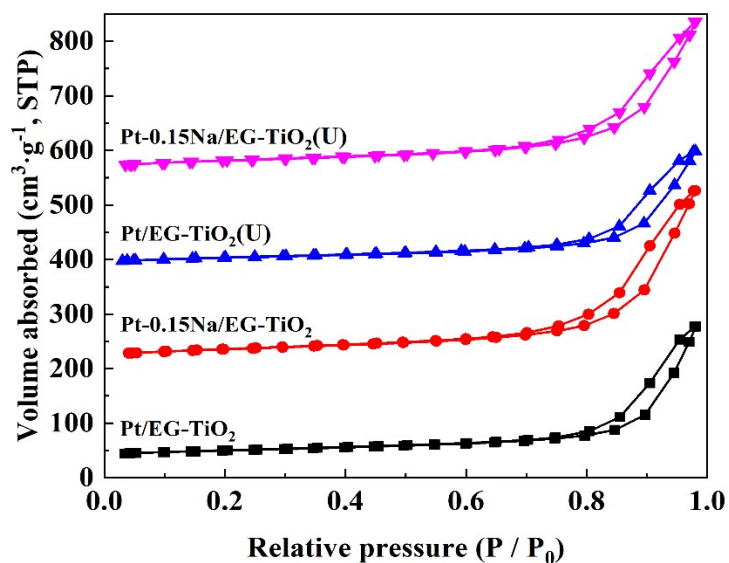

Fig. S7 N<sub>2</sub> adsorption-desorption isotherms of the samples.

Table S4 BET surface areas, pore volumes, and pore sizes of the samples.

| Samples                           | BET surface area (m <sup>2</sup> ·g <sup>-1</sup> ) | Pore volume (cm <sup>3</sup> ·g <sup>-1</sup> ) | Pore size (nm) |
|-----------------------------------|-----------------------------------------------------|-------------------------------------------------|----------------|
| Pt/EG-TiO <sub>2</sub>            | 97                                                  | 0.5                                             | 18.1           |
| Pt-0.15Na/EG-TiO <sub>2</sub>     | 98                                                  | 0.5                                             | 18.1           |
| Pt/EG-TiO <sub>2</sub> (U)        | 92                                                  | 0.4                                             | 17.5           |
| Pt-0.15Na/EG-TiO <sub>2</sub> (U) | 95                                                  | 0.4                                             | 17.9           |

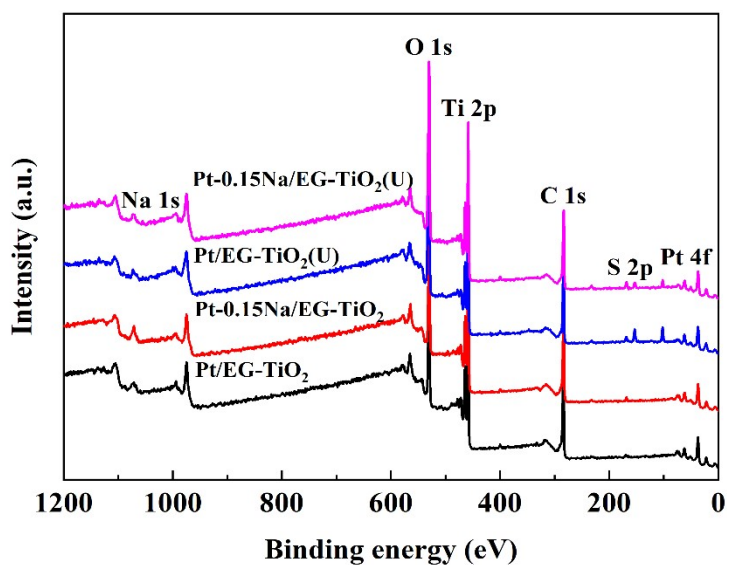

Fig. S8 XPS survey spectrum of the samples.

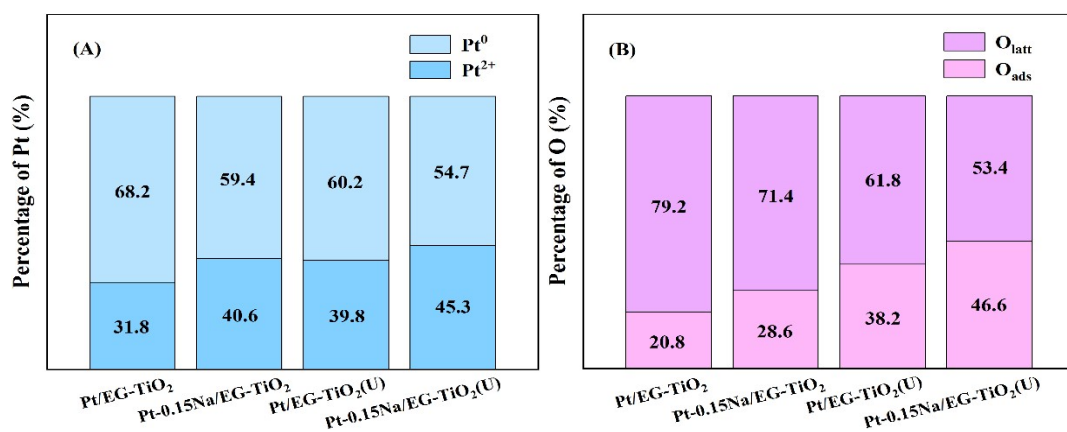

Fig. S9 Surface element compositions of (A) Pt and (B) O on the samples.

Table S5 XPS binding energies (BEs) of the samples.

| Samples                           | Pt <sup>2+</sup> 4f |      | Pt <sup>0</sup> 4f |      | O <sub>ads</sub> 1s |      | O <sub>latt</sub> 1s |      |
|-----------------------------------|---------------------|------|--------------------|------|---------------------|------|----------------------|------|
|                                   | BE                  | Area | BE                 | Area | BE                  | Area | BE                   | Area |
| Pt/EG-TiO <sub>2</sub>            | 72.5                | 14.4 | 71.4               | 33.5 |                     |      |                      |      |
|                                   |                     |      |                    |      | 531.4               | 20.8 | 529.4                | 79.2 |
|                                   | 75.9                | 17.4 | 74.4               | 34.7 |                     |      |                      |      |
| Pt-0.15Na/EG-TiO <sub>2</sub>     | 72.4                | 21.1 | 71.1               | 27.7 |                     |      |                      |      |
|                                   |                     |      |                    |      | 531.3               | 28.6 | 529.3                | 71.4 |
|                                   | 75.9                | 19.5 | 74.3               | 31.7 |                     |      |                      |      |
| Pt/EG-TiO <sub>2</sub> (U)        | 72.1                | 21.9 | 71.3               | 20.9 |                     |      |                      |      |
|                                   |                     |      |                    |      | 531.3               | 38.2 | 529.2                | 61.8 |
|                                   | 75.8                | 17.9 | 74.2               | 39.3 |                     |      |                      |      |
| Pt-0.15Na/EG-TiO <sub>2</sub> (U) | 72.3                | 15.5 | 71.1               | 22.3 |                     |      |                      |      |
|                                   |                     |      |                    |      | 531.0               | 46.6 | 529.2                | 53.4 |
|                                   | 75.7                | 29.8 | 74.3               | 32.4 |                     |      |                      |      |

The unit of BE is (eV) and Area is percentage content (%).

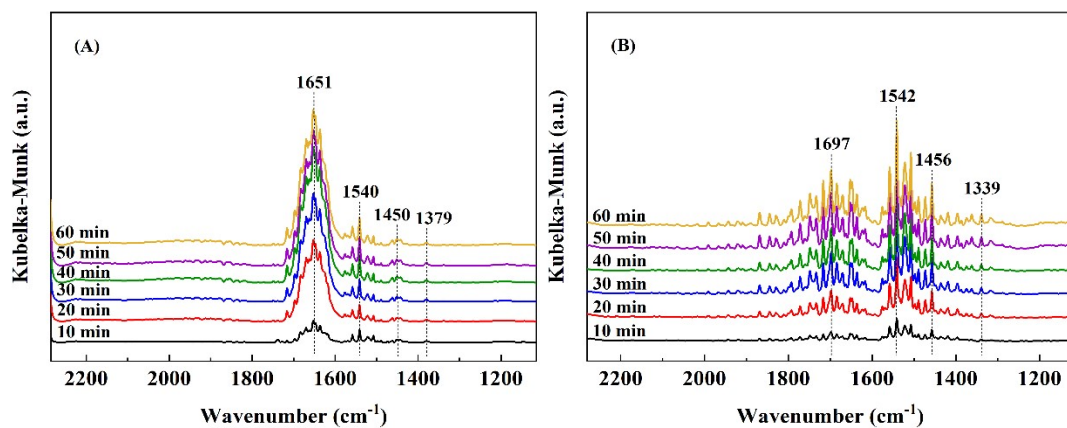

**Fig. S10** At 220 °C, CO + O<sub>2</sub> + SO<sub>2</sub> DRIFTS spectra of (A) the Pt/EG-TiO<sub>2</sub> catalysts with time, and (B) the Pt-0.15Na/EG-TiO<sub>2</sub> catalysts with time. Reaction conditions: 1 vol% CO, 16 vol% O<sub>2</sub>, 100 ppm SO<sub>2</sub>.

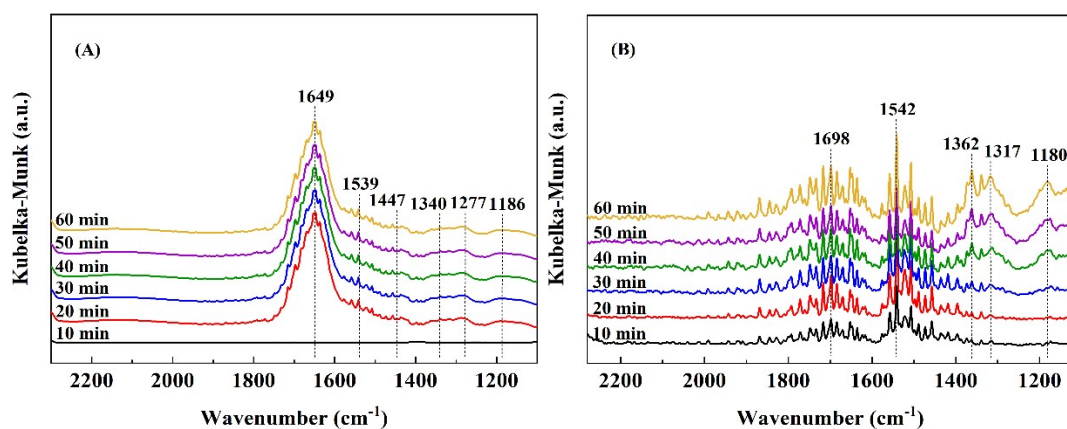

**Fig. S11** At 220 °C, CO + O<sub>2</sub> + SO<sub>2</sub> + H<sub>2</sub>O DRIFTS spectra of (A) the Pt/EG-TiO<sub>2</sub> catalysts with time, and (B) the Pt-0.15Na/EG-TiO<sub>2</sub> catalysts with time. Reaction conditions: 1 vol% CO, 16 vol% O<sub>2</sub>, 100 ppm SO<sub>2</sub>, 3 vol% H<sub>2</sub>O, He (balance).
